# Supplementary material
Source: PubMed Central journal article supplement (PMC4800828)
Supplement: NIHMS736430-supplement-Supp_TabS1-S3___FigS1-3.pdf [file NIHMS736430-supplement-Supp_TabS1-S3___FigS1-3.pdf]

## Supplemental Tables and Figures

Table S1. Comparison of ICA components with Laird's 20 intrinsic connectivity networks and Yeo's 7 cortical parcellation. The table below shows the correlation between area connectivities identified as within a network using our analysis compared to networks derived from two analysis previously published. These are voxel wise correlations using the Smith et al. (2009) recommended procedure for comparing ICA results. Correlations of above .25 are typically considered to show reasonable similarity. In the case of our DMN and SN. we show substantial agreement with the networks so named in the two published studies. The single asterisks in the table indicate the matches with the other studies.

| Component | with Laird's 20 ICN**                          | with Yeo 7 Cortical<br>Networks*** | Assessment                        |
|-----------|------------------------------------------------|------------------------------------|-----------------------------------|
| 1         | 13 (r=0.21); 9 (r=0.22)                        | 3 (r=0.23); 4 (r=0.22)             | Attention                         |
| 2         | 15(r=0.59)                                     | 6 (r=0.51)                         | Frontoparietal                    |
| 3         | 7 (r=0.21); 12 (r=0.28)                        | 1 (r=0.29)                         |                                   |
| 4         | 7 (r=0.27); 13 (r=0.34)                        | 7 (r=0.29)                         | Posterior Default Mode            |
| 5         | 3 (r=0.2); 2 (r=0.34)                          |                                    | OFC                               |
| 6         | 12 (r=0.31); 11 (r=0.35); 10 (r=0.55)          | 1 (r=0.51)                         | Visual                            |
| 7         | 12 (r=0.59)                                    | 1 (r=0.38)                         | Visual                            |
| 8         | 12 (r=0.21); 11 (r=0.41)                       | 1 (r=0.21)                         | Visual                            |
| 9         | 1 (r=0.2); 13* (r=0.34)                        | 7* (r=0.29)                        | Default Mode Network              |
| 10        | 20 (r=0.21); 6 (r=0.33); 7(r=0.54)             | 3 (r=0.42)                         | Parietal, Attention               |
| 11        | 3 (r=0.22); 17 (r=0.26); 2 (r=0.28); 4*(r=0.5) | 4* (r=0.44)                        | Saliience Network                 |
| 12        | 1 (r=0.33); 5(r=0.37); 3(r=0.52)               |                                    | BG                                |
| 13        | 16 (r=0.23); 17(r=0.54)                        | 2 (r=0.42)                         | Dorsal Precentral,<br>Somatomotor |

|    |                                                              |            |                                              |
|----|--------------------------------------------------------------|------------|----------------------------------------------|
| 14 | 13 (r=0.28); 2(r=0.33); 20(r=0.35)                           | 7 (r=0.48) |                                              |
| 15 | 10 (r=0.22); 4(r=0.25); 13(r=0.26); 1(r=0.28);<br>16(r=0.47) | 7 (r=0.31) |                                              |
| 16 | 17 (r=0.3); 8(r=0.46)                                        | 3 (r=0.39) | Ventral precentral gyri, Dorsal<br>Attention |
| 17 | 8 (r=0.27); 6(r=0.38); 9(r=0.4)                              | 2 (r=0.42) | Superior Parietal, Somatomotor               |
| 18 | 2 (r=0.39)                                                   | 5 (r=0.4)  | OFC, Limbic                                  |
| 19 | 15 (r=0.2); 20(r=0.22); 18(0.51)                             | 6 (r=0.35) | Left Frontal<br>Parietal, Frontoparietal     |

---

\*: Matched

\*\* Laird's 20 ICN network (Laird et al., 2011): 1) Limbic and medial-temporal area, 2) Subgenual ACC and OFC, 3) Bilateral BG and thalamus, 4) Bilateral anterior insula, 5) Midbrain, 6) Superior and middle frontal gyri, 7) Middle frontal gyri and Superior parietal lobules, 8) Ventral precentral gyri, central sulci, postcentral gyri, superior and inferior cerebellum, 9) Superior parietal lobule, 10) Middle and inferior temporal gyri, 11&12) Lateral and medial posterior occipital cortices, 13) DMN, 14) Cerebellum, 15) Right-lateralized fronto-parietal regions, 16) Transverse temporal gyri, 17) Dorsal precentral gyri, central sulci, postcentral gyri superior and inferior cerebellum, 18) Left-lateralized fronto-parietal regions, 19&20) artifacts

\*\*\* Yeo's 7 Cortical Parcellations (Yeo et al., 2011): 1) Visual, 2) Somatomotor, 3) Dorsal Attention, 4) Ventral Attention, 5) Limbic, 6) Frontoparietal, 7) Default Mode

Table S2A. Regions in which the connectivity with mPFC seed positively correlated with high frequency heart rate variability ( $p < 0.02$ ,  $T > 2.07$ ,  $K > 80$ )

|                                                             |                  | Cluster Size                   | Peak coordinates |     |     | Peak Z-value |
|-------------------------------------------------------------|------------------|--------------------------------|------------------|-----|-----|--------------|
|                                                             |                  | Threshold at<br>T=2.07, p=0.02 | X                | y   | z   |              |
| Cingulate Gyrus (dorsal)                                    | BA24, 32         | 610                            | -2               | 16  | 28  | 3.76         |
| Cingulate Gyrus (mid) ; Medial frontal Gyrus                | BA24, BA6        | 776                            | 0                | -12 | 40  | 3.42         |
| Cingulate Gyrus (posterior)                                 | BA31             | 313                            | -8               | -34 | 42  | 2.89         |
| Anterior Cingulate (pgACC)                                  | BA32, 24         | 377                            | -4               | 46  | 2   | 3.39         |
| Medial Frontal Gyrus                                        | BA9, BA10        | 83                             | -4               | 66  | 12  | 2.66         |
| L Superior Temporal Gyrus; Precentral Gyrus                 | BA22, BA44, BA6  | 1647                           | -62              | 0   | -8  | 4.33         |
| R Superior Temporal Gyrus, Insula                           | BA22, BA44, BA13 | 569                            | 50               | -2  | -10 | 3.34         |
| L Insula (Anterior)                                         | BA13             | 131                            | -42              | 20  | 4   | 3.28         |
| Thalamus                                                    |                  | 85                             | 10               | -16 | 0   | 3.12         |
| R Cuneus, Precuneus                                         | BA7              | 805                            | 14               | -72 | 36  | 4.35         |
| R Cuneus                                                    | BA17, BA18       | 571                            | 8                | -94 | 22  | 2.97         |
| L/R Postcentral Gyrus                                       | BA7              | 1127                           | 20               | -44 | 72  | 4.46         |
| R Inferior Parietal Lobule                                  | BA40             | 349                            | 68               | -20 | 28  | 3.28         |
| R Middle/Inferior Occipital Gyrus                           | BA18, BA19       | 431                            | 44               | -82 | 4   | 2.90         |
| L Lingual Gyrus; Middle Occipital Gyrus (some white matter) | BA19             | 896                            | -34              | -62 | 6   | 3.71         |
| Cerebellum                                                  |                  | 778                            | 28               | -68 | -22 | 3.46         |

Table S2B. Regions in which the connectivity with mPFC seed negatively correlated with high frequency heart rate variability ( $p < 0.02$ ,  $T > 2.07$ ,  $K > 80$ )

|            | Cluster Size                        | Peak coordinates |     |     | Peak Z-value |
|------------|-------------------------------------|------------------|-----|-----|--------------|
|            | Threshold at<br>$T=2.07$ , $p=0.02$ | X                | y   | z   |              |
| Cerebellum | 1066                                | -42              | -70 | -44 | 4.73         |
| Pons       | 114                                 | -4               | -44 | -42 | 3.06         |
|            | 126                                 | -0               | -12 | -36 | 2.89         |

Table S3. Clusters within DMN and SN showed the connectivity with SN or DMN correlated with high frequency heart rate variability (HF-HRV); SPM result threshold at  $p \leq 0.01$  and cluster size  $k \geq 49$

(A) DMN connectivity positively correlated with HF-HRV

| Clusters                   | Cluster Size | Peak coordinates      |    |    | Effect Size<br>r (df=203) |      |
|----------------------------|--------------|-----------------------|----|----|---------------------------|------|
|                            |              | Threshold at $p=0.01$ | X  | y  |                           | z    |
| Anterior Cingulate (pgACC) | BA 32        | 58                    | 10 | 46 | -4                        | 0.27 |
| Right Insula               |              | 95                    | 42 | 10 | -2                        | 0.26 |

(B) DMN connectivity negatively correlated with HF-HRV

|                         |  |     |     |    |     |      |
|-------------------------|--|-----|-----|----|-----|------|
| Left Putaman            |  | 303 | -28 | 6  | 4   | 0.27 |
| Lateral Globus Pallidus |  | 56  | -2  | 6  | 48  | 0.24 |
| Right Putamen           |  | 52  | 22  | 10 | -12 | 0.23 |

(C) SN connectivity positively correlated with HF-HRV

|                            |          |    |     |     |     |      |
|----------------------------|----------|----|-----|-----|-----|------|
| Anterior Cingulate (pgACC) | BA32     | 85 | -4  | 48  | 2   | 0.29 |
| Posterior Cingulate        | BA30     | 75 | -12 | -64 | 14  | 0.27 |
| Insula                     | BA13, 47 | 49 | 38  | 16  | -14 | 0.23 |
| Precentral Gyrus           | BA 6,44  | 72 | -56 | 4   | 8   | 0.23 |
| Thalamus                   |          | 68 | -2  | -10 | -2  | 0.22 |
| Superior Occipital Gyrus   | BA 19    | 64 | 38  | -76 | 36  | 0.22 |

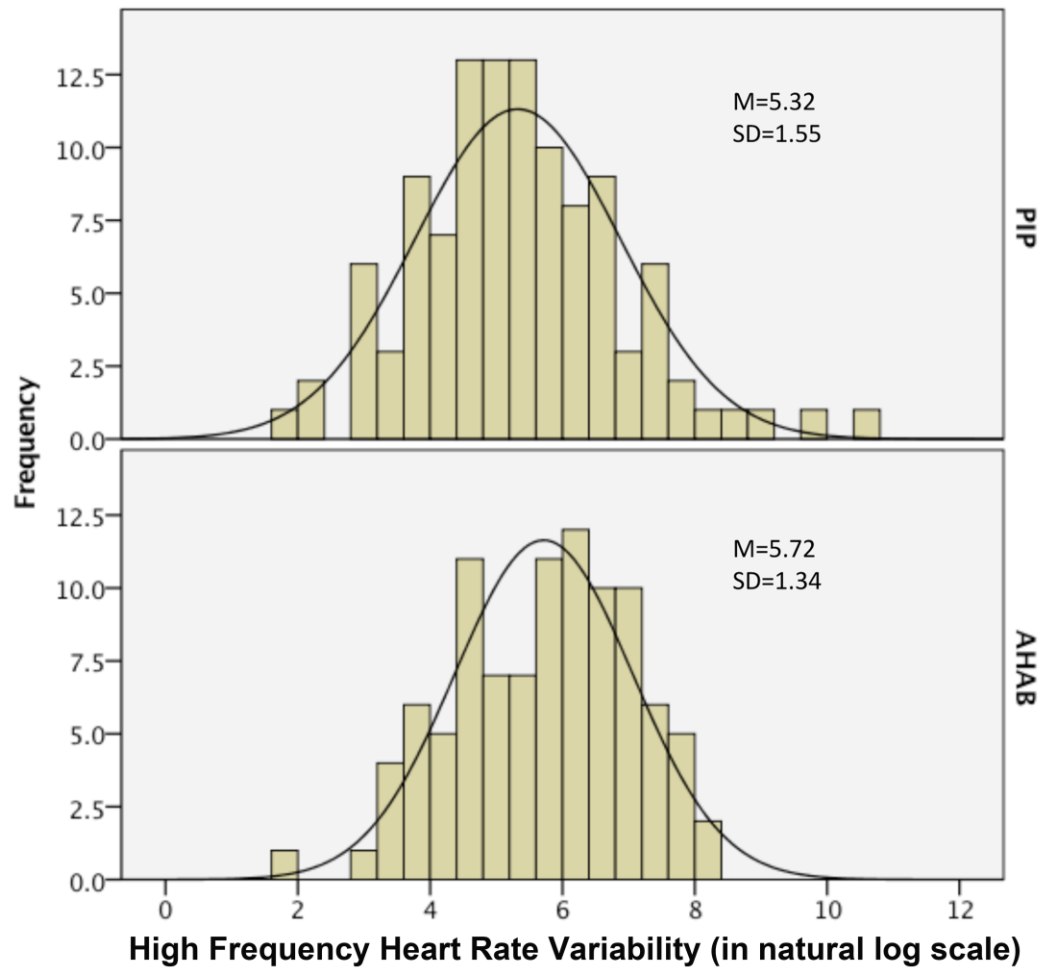

Figure S1 Distribution of High Frequency Heart Rate Variability for PIP and AHAB projects

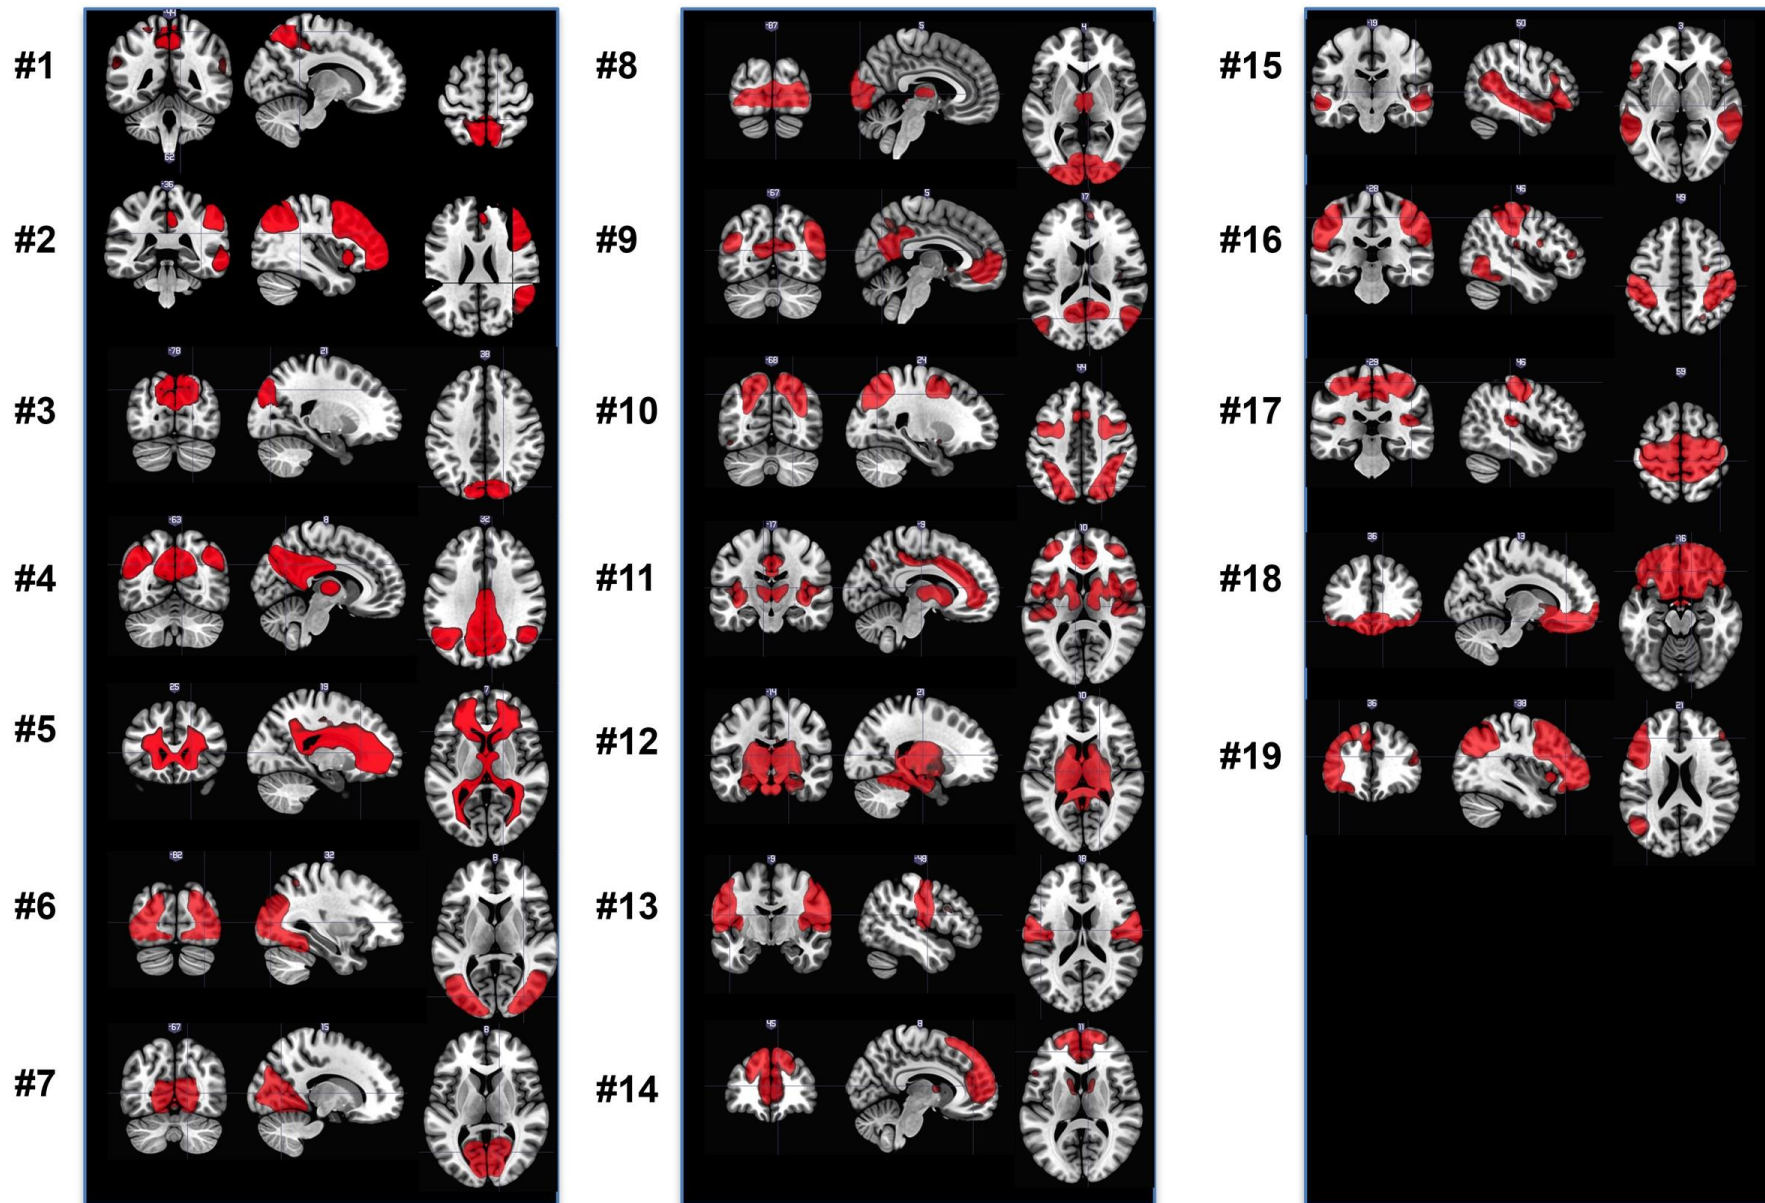

Figure S2. 19 Independent Components were extracted from resting BOLD signals. IC#9 was identified as DMN and IC#11 the SN.

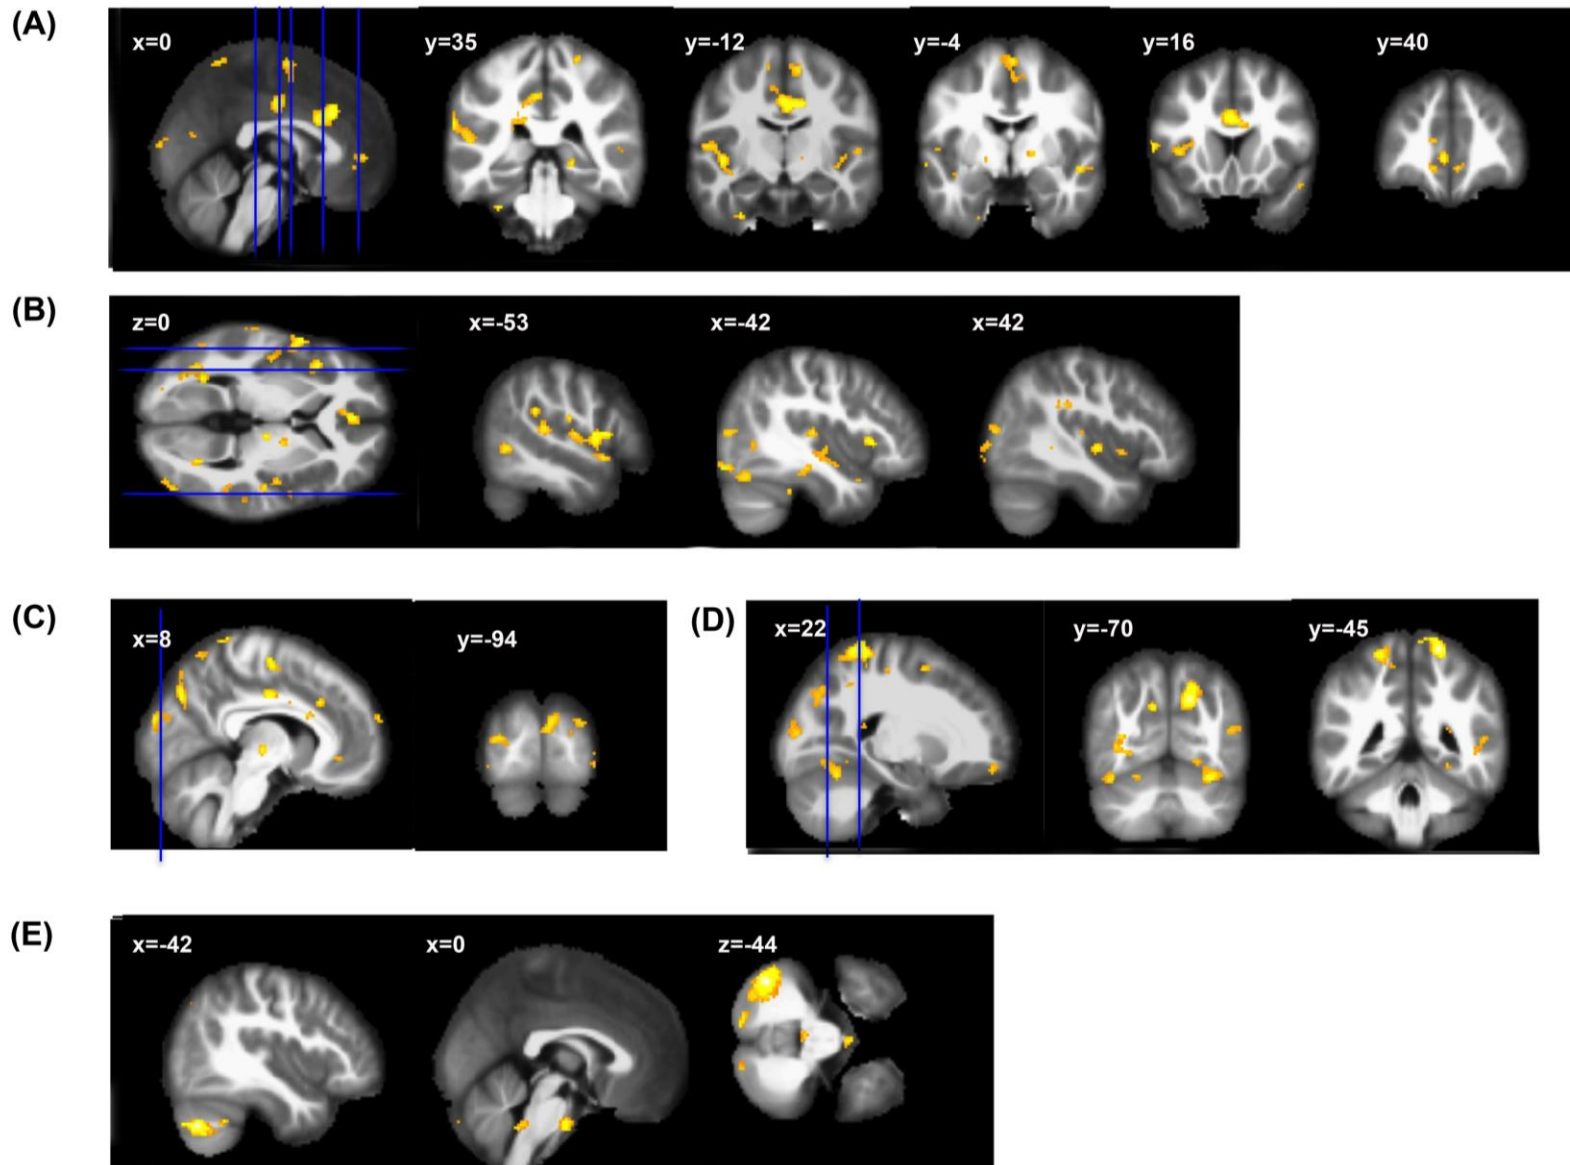

Figure S3. Whole brain search result. Shown are regions where the connectivity with mPFC seed correlated with high frequency heart rate variability ( $p < 0.02$ ,  $T > 2.07$ ). Detailed coordinates and statistics are shown in Tables S2A and S2B. (A)-(D) are for positive correlations and (E) are for negative correlations. (A) Medial view, including posterior cingulate ( $y = -35$ ), mid cingulate gyrus ( $y = -12$ ), medial frontal gyrus ( $y = -4$ ), dorsal cingulate gyrus ( $y = 16$ ), and anterior cingulate ( $y = 40$ ); (B) Lateral view: including superior temporal gyrus ( $y = -53$ ) and Insula lobe ( $y = +42$ ); (C) occipital; (D) cerebellum and postcentral gyrus ( $y = -45$ ); (E) Cerebellum and pons.
